# Supplementary material
Source: PubMed Central journal article supplement (PMC8580285)
Supplement: NIHMS1721351-supplement-supinfo.pdf [file NIHMS1721351-supplement-supinfo.pdf]

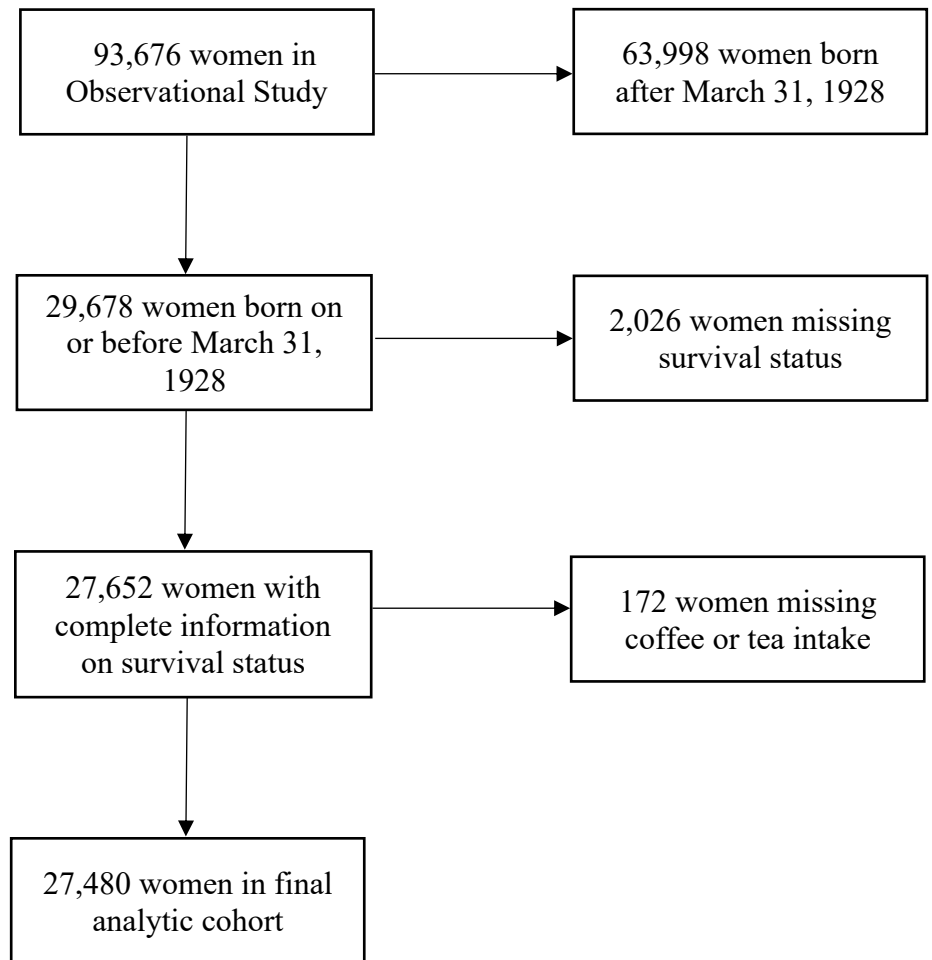

Supplementary Figure S1. Participant disposition.

Supplementary Table S1. Baseline characteristics by caffeinated coffee consumption among older women, Women's Health Initiative (N=26948)

|                                                           | Caffeinated coffee consumption |                       |                          |                         | <i>P</i> -value |
|-----------------------------------------------------------|--------------------------------|-----------------------|--------------------------|-------------------------|-----------------|
|                                                           | None<br>(n=11765)              | 1 cup/day<br>(n=5157) | 2-3 cups/day<br>(n=7788) | ≥4 cups/day<br>(n=2238) |                 |
| Recreational physical activity, mean (SD), MET-hours/week | 13.6 (14.1)                    | 12.9 (13.3)           | 12.9 (13.4)              | 12.6 (14.0)             | <0.001          |
| Oral contraceptive use                                    | 2011 (17.1)                    | 852 (16.5)            | 1398 (18.0)              | 427 (19.1)              | 0.02            |
| Hormone therapy use                                       |                                |                       |                          |                         |                 |
| Never                                                     | 4102 (35.6)                    | 1843 (36.4)           | 2779 (36.4)              | 911 (41.5)              | <0.001          |
| Past                                                      | 3187 (27.6)                    | 1354 (26.8)           | 2188 (28.7)              | 604 (27.5)              |                 |
| Current                                                   | 4243 (36.8)                    | 1865 (36.8)           | 2664 (34.9)              | 683 (31.1)              |                 |
| History of depressive symptoms                            | 1044 (9.2)                     | 439 (8.8)             | 684 (9.1)                | 228 (10.5)              | 0.14            |
| Physical function score, mean (SD)                        | 74.0 (22.3)                    | 75.3 (21.7)           | 76.8 (20.5)              | 77.8 (20.8)             | <0.001          |

Supplementary Table S2. Baseline characteristics by decaffeinated coffee consumption among older women, Women's Health Initiative (N=26721)

|                                    | Decaffeinated coffee consumption |                       |                          |                        | P-value |
|------------------------------------|----------------------------------|-----------------------|--------------------------|------------------------|---------|
|                                    | None<br>(n=17751)                | 1 cup/day<br>(n=4355) | 2-3 cups/day<br>(n=3762) | ≥4 cups/day<br>(n=853) |         |
| Age, mean (SD), years              | 72.4 (3.1)                       | 72.4 (3.1)            | 72.2 (3.0)               | 72.0 (3.0)             | <0.001  |
| Race/ethnicity                     |                                  |                       |                          |                        |         |
| White                              | 15302 (86.5)                     | 3842 (88.5)           | 3467 (92.6)              | 808 (94.7)             |         |
| Black                              | 1171 (6.6)                       | 240 (5.5)             | 136 (3.6)                | 10 (1.2)               |         |
| Hispanic                           | 346 (2.0)                        | 87 (2.0)              | 54 (1.4)                 | 9 (1.1)                | <0.001  |
| Asian/Pacific Islander             | 600 (3.4)                        | 108 (2.5)             | 40 (1.1)                 | 9 (1.1)                |         |
| Other                              | 263 (1.5)                        | 66 (1.5)              | 46 (1.2)                 | 17 (2.0)               |         |
| Educational level                  |                                  |                       |                          |                        |         |
| Less than high school              | 1190 (6.8)                       | 284 (6.6)             | 242 (6.5)                | 27 (3.2)               |         |
| High school                        | 3135 (17.8)                      | 744 (17.2)            | 689 (18.4)               | 165 (19.5)             |         |
| Some college                       | 6802 (38.6)                      | 1618 (37.5)           | 1416 (37.9)              | 331 (39.1)             | 0.005   |
| College graduate                   | 6504 (36.9)                      | 1675 (38.8)           | 1393 (37.3)              | 324 (38.3)             |         |
| Income                             |                                  |                       |                          |                        |         |
| <\$20,000                          | 4149 (25.6)                      | 919 (23.1)            | 704 (20.4)               | 148 (19.2)             |         |
| \$20,000-<br><\$50,000             | 8085 (49.9)                      | 1991 (49.9)           | 1831 (52.9)              | 417 (54.2)             | <0.001  |
| ≥\$50,000                          | 3955 (24.4)                      | 1077 (27.0)           | 924 (26.7)               | 205 (26.6)             |         |
| Marital status                     |                                  |                       |                          |                        |         |
| Married/living as married          | 8846 (50.1)                      | 2312 (53.4)           | 2133 (56.9)              | 465 (54.8)             |         |
| Widowed                            | 5848 (33.1)                      | 1374 (31.7)           | 1128 (30.1)              | 270 (31.8)             |         |
| Divorced/separated                 | 2146 (12.2)                      | 444 (10.3)            | 339 (9.1)                | 83 (9.8)               | <0.001  |
| Never married                      | 824 (4.7)                        | 203 (4.7)             | 147 (3.9)                | 31 (3.7)               |         |
| Currently employed                 | 1825 (10.6)                      | 420 (10.0)            | 373 (10.3)               | 86 (10.5)              | 0.64    |
| Smoking history                    |                                  |                       |                          |                        |         |
| Never smoked                       | 9693 (55.6)                      | 2363 (55.4)           | 1784 (48.2)              | 354 (42.6)             |         |
| Past smoker                        | 6895 (39.5)                      | 1787 (41.9)           | 1777 (48.0)              | 431 (51.9)             | <0.001  |
| Current smoker                     | 856 (4.9)                        | 117 (2.7)             | 138 (3.7)                | 46 (5.5)               |         |
| Pack-years of smoking, mean (SD)   | 10.3 (20.4)                      | 9.0 (18.0)            | 11.9 (21.1)              | 17.0 (24.5)            | <0.001  |
| Alcohol intake                     |                                  |                       |                          |                        |         |
| Nondrinker                         | 2590 (14.7)                      | 529 (12.3)            | 337 (9.0)                | 87 (10.3)              |         |
| Past drinker                       | 3744 (21.3)                      | 830 (19.2)            | 683 (18.2)               | 147 (17.4)             | <0.001  |
| Current drinker                    | 11265 (64.0)                     | 2960 (68.5)           | 2724 (72.8)              | 611 (72.3)             |         |
| Body mass index, kg/m <sup>2</sup> |                                  |                       |                          |                        |         |

|                                                           | Decaffeinated coffee consumption |                       |                          |                        | P-value |
|-----------------------------------------------------------|----------------------------------|-----------------------|--------------------------|------------------------|---------|
|                                                           | None<br>(n=17751)                | 1 cup/day<br>(n=4355) | 2-3 cups/day<br>(n=3762) | ≥4 cups/day<br>(n=853) |         |
| Normal weight                                             | 7176 (41.5)                      | 1784 (42.2)           | 1463 (39.7)              | 324 (39.3)             | 0.001   |
| Overweight                                                | 6180 (35.8)                      | 1558 (36.8)           | 1441 (39.1)              | 327 (39.6)             |         |
| Obese                                                     | 3919 (22.7)                      | 891 (21.1)            | 779 (21.2)               | 174 (21.1)             |         |
| Recreational physical activity, mean (SD), MET-hours/week | 12.9 (13.9)                      | 13.3 (13.4)           | 14.0 (13.5)              | 14.4 (13.3)            | <0.001  |
| Healthy Eating Index-2015 score, mean (SD)                | 68.1 (10.3)                      | 69.0 (9.7)            | 69.1 (9.7)               | 68.4 (9.8)             | <0.001  |
| Oral contraceptive use                                    | 3132 (17.6)                      | 709 (16.3)            | 672 (17.9)               | 153 (17.9)             | 0.16    |
| Hormone therapy use                                       |                                  |                       |                          |                        |         |
| Never                                                     | 6393 (36.7)                      | 1499 (35.1)           | 1309 (35.5)              | 320 (38.3)             | 0.04    |
| Past                                                      | 4784 (27.5)                      | 1243 (29.1)           | 991 (26.9)               | 238 (28.5)             |         |
| Current                                                   | 6230 (35.8)                      | 1529 (35.8)           | 1385 (37.6)              | 277 (33.2)             |         |
| History of depressive symptoms                            | 1580 (9.2)                       | 396 (9.4)             | 308 (8.5)                | 77 (9.3)               | 0.48    |
| Physical function score, mean (SD)                        | 75.0 (22.0)                      | 75.4 (21.0)           | 76.2 (20.8)              | 78.5 (19.2)            | <0.001  |
| History of major chronic diseases                         |                                  |                       |                          |                        |         |
| Coronary heart disease                                    | 685 (3.9)                        | 193 (4.4)             | 157 (4.2)                | 48 (5.6)               | 0.03    |
| Stroke                                                    | 461 (2.6)                        | 104 (2.4)             | 78 (2.1)                 | 17 (2.0)               | 0.20    |
| Cancer                                                    | 2813 (16.1)                      | 727 (16.9)            | 575 (15.5)               | 124 (14.8)             | 0.25    |
| Diabetes                                                  | 925 (5.2)                        | 192 (4.4)             | 175 (4.7)                | 35 (4.1)               | 0.06    |
| Self-rated health                                         |                                  |                       |                          |                        |         |
| Excellent                                                 | 2397 (13.6)                      | 545 (12.6)            | 475 (12.8)               | 132 (15.6)             | <0.001  |
| Very good                                                 | 6820 (38.8)                      | 1626 (37.7)           | 1526 (41.0)              | 369 (43.5)             |         |
| Good                                                      | 6371 (36.2)                      | 1668 (38.7)           | 1351 (36.3)              | 270 (31.8)             |         |
| Fair/poor                                                 | 2007 (11.4)                      | 476 (11.0)            | 368 (9.9)                | 77 (9.1)               |         |

Supplementary Table S3. Baseline characteristics by caffeinated tea consumption among older women, Women's Health Initiative (N=27205)

|                                                           | Caffeinated tea consumption |                       |                          |                        | P-value |
|-----------------------------------------------------------|-----------------------------|-----------------------|--------------------------|------------------------|---------|
|                                                           | None<br>(n=19886)           | 1 cup/day<br>(n=3620) | 2-3 cups/day<br>(n=3044) | ≥4 cups/day<br>(n=655) |         |
| Recreational physical activity, mean (SD), MET-hours/week | 13.1 (13.7)                 | 13.3 (13.8)           | 13.1 (13.4)              | 13.4 (15.0)            | 0.64    |
| Oral contraceptive use                                    | 3468 (17.4)                 | 656 (18.1)            | 500 (16.4)               | 114 (17.4)             | 0.34    |
| Hormone therapy use                                       |                             |                       |                          |                        |         |
| Never                                                     | 7022 (36.0)                 | 1337 (37.6)           | 1128 (37.8)              | 239 (36.9)             | 0.02    |
| Past                                                      | 5396 (27.7)                 | 952 (26.8)            | 872 (29.2)               | 178 (27.5)             |         |
| Current                                                   | 7066 (36.3)                 | 1267 (35.6)           | 988 (33.1)               | 231 (35.7)             |         |
| History of depressive symptoms                            | 1761 (9.2)                  | 307 (8.8)             | 271 (9.2)                | 67 (10.5)              | 0.62    |
| Physical function score, mean (SD)                        | 75.2 (21.7)                 | 76.0 (21.3)           | 75.6 (21.5)              | 76.3 (21.3)            | 0.17    |

Supplementary Table S4. Multivariable associations of coffee and tea consumption with survival to age 90 among older women (excluding women with fair or poor health at baseline), Women's Health Initiative, 1993-2018

|                                 | No./total survived to age 90‡ | OR (95% CI)      | P-value for trend |
|---------------------------------|-------------------------------|------------------|-------------------|
| Caffeinated coffee, cups/day*   |                               |                  |                   |
| None                            | 5787/10317 (56.1)             | 1.00             |                   |
| 1                               | 2571/4569 (56.3)              | 0.95 (0.87-1.04) |                   |
| 2-3                             | 3917/7061 (55.5)              | 1.02 (0.95-1.11) | 0.21              |
| ≥4                              | 1087/2063 (52.7)              | 1.10 (0.97-1.24) |                   |
| Decaffeinated coffee, cups/day* |                               |                  |                   |
| None                            | 8739/15744 (55.5)             | 1.00             |                   |
| 1                               | 2193/3879 (56.5)              | 1.07 (0.98-1.16) |                   |
| 2-3                             | 1906/3394 (56.2)              | 1.08 (0.98-1.19) | 0.45              |
| ≥4                              | 394/776 (50.8)                | 0.88 (0.73-1.06) |                   |
| Caffeinated tea, cups/day†      |                               |                  |                   |
| None                            | 9768/17721 (55.1)             | 1.00             |                   |
| 1                               | 1857/3211 (57.8)              | 1.07 (0.97-1.17) |                   |
| 2-3                             | 1526/2711 (56.3)              | 1.03 (0.93-1.15) | 0.55              |
| ≥4                              | 325/591 (55.0)                | 0.95 (0.77-1.17) |                   |

CI, confidence interval; OR, odds ratio.

\*Multivariable model includes caffeinated coffee intake, decaffeinated coffee intake, age, race/ethnicity, marital status, education, employment status, income, smoking history, pack-years of smoking, alcohol consumption, body mass index, total physical activity, oral contraceptive use, hormone therapy use, Healthy Eating Index-2015 score, self-rated health, physical function, depressive symptoms, coronary heart disease, stroke, diabetes, and cancer (N=17418 for caffeinated and decaffeinated coffee models).

†Multivariable model includes caffeinated coffee intake, decaffeinated coffee intake, age, race/ethnicity, marital status, education, employment status, income, smoking history, pack-years of smoking, alcohol consumption, body mass index, total physical activity, oral contraceptive use, hormone therapy use, Healthy Eating Index-2015 score, self-rated health, physical function, depressive symptoms, coronary heart disease, stroke, diabetes, and cancer (N=17292 for caffeinated tea model).

‡Represents the no./total survived to age 90 among each individual category of beverage intake.

Supplementary Table S5. Multivariable associations of coffee and tea consumption with survival to age 90 among older women (excluding women with preexisting chronic diseases at baseline), Women's Health Initiative, 1993-2018

|                                        | No./total survived to age 90 <sup>‡</sup> | OR (95% CI)      | P-value for trend |
|----------------------------------------|-------------------------------------------|------------------|-------------------|
| Caffeinated coffee, cups/day*          |                                           |                  |                   |
| None                                   | 4984/8777 (56.8)                          | 1.00             |                   |
| 1                                      | 2243/3881 (57.8)                          | 0.98 (0.89-1.08) |                   |
| 2-3                                    | 3419/6013 (56.9)                          | 1.07 (0.98-1.16) | 0.02              |
| ≥4                                     | 952/1740 (54.7)                           | 1.16 (1.02-1.33) |                   |
| Decaffeinated coffee, cups/day*        |                                           |                  |                   |
| None                                   | 7614/13417 (56.8)                         | 1.00             |                   |
| 1                                      | 1900/3285 (57.8)                          | 1.10 (1.00-1.21) |                   |
| 2-3                                    | 1639/2875 (57.0)                          | 1.06 (0.96-1.18) | 0.67              |
| ≥4                                     | 332/647 (51.3)                            | 0.85 (0.70-1.04) |                   |
| Caffeinated tea, cups/day <sup>†</sup> |                                           |                  |                   |
| None                                   | 8523/15148 (56.3)                         | 1.00             |                   |
| 1                                      | 1580/2703 (58.5)                          | 1.02 (0.92-1.13) |                   |
| 2-3                                    | 1316/2254 (58.4)                          | 1.07 (0.96-1.20) | 0.34              |
| ≥4                                     | 284/499 (56.9)                            | 1.00 (0.80-1.25) |                   |

CI, confidence interval; OR, odds ratio.

\*Multivariable model includes caffeinated coffee intake, decaffeinated coffee intake, age, race/ethnicity, marital status, education, employment status, income, smoking history, pack-years of smoking, alcohol consumption, body mass index, total physical activity, oral contraceptive use, hormone therapy use, Healthy Eating Index-2015 score, self-rated health, physical function, and depressive symptoms (N=14845 for caffeinated and decaffeinated coffee models).

<sup>†</sup>Multivariable model includes caffeinated coffee intake, decaffeinated coffee intake, age, race/ethnicity, marital status, education, employment status, income, smoking history, pack-years of smoking, alcohol consumption, body mass index, total physical activity, oral contraceptive use, hormone therapy use, Healthy Eating Index-2015 score, self-rated health, physical function, and depressive symptoms (N=14742 for caffeinated tea model).

<sup>‡</sup>Represents the no./total survived to age 90 among each individual category of beverage intake.

Supplementary Table S6. Multivariable associations of coffee and tea consumption with survival to age 90 among older women stratified by race/ethnicity, Women's Health Initiative, 1993-2018\*

|                                             | No./total survived to age 90 <sup>§</sup> | OR (95% CI)      | P-value for trend |
|---------------------------------------------|-------------------------------------------|------------------|-------------------|
| White                                       |                                           |                  |                   |
| Caffeinated coffee, cups/day <sup>†</sup>   |                                           |                  |                   |
| None                                        | 5358/10003 (53.6)                         | 1.00             |                   |
| 1                                           | 2354/4362 (54.0)                          | 0.94 (0.86-1.03) |                   |
| 2-3                                         | 3790/7090 (53.5)                          | 1.01 (0.93-1.09) | 0.48              |
| ≥4                                          | 1079/2130 (50.7)                          | 1.07 (0.95-1.21) |                   |
| Decaffeinated coffee, cups/day <sup>†</sup> |                                           |                  |                   |
| None                                        | 8112/15302 (53.0)                         | 1.00             |                   |
| 1                                           | 2098/3842 (54.6)                          | 1.05 (0.96-1.14) |                   |
| 2-3                                         | 1882/3467 (54.3)                          | 1.06 (0.96-1.16) | 0.83              |
| ≥4                                          | 396/808 (49.0)                            | 0.90 (0.75-1.08) |                   |
| Caffeinated tea, cups/day <sup>‡</sup>      |                                           |                  |                   |
| None                                        | 9170/17359 (52.8)                         | 1.00             |                   |
| 1                                           | 1771/3200 (55.3)                          | 1.07 (0.97-1.18) |                   |
| 2-3                                         | 1440/2664 (54.1)                          | 1.07 (0.96-1.18) | 0.28              |
| ≥4                                          | 313/595 (52.6)                            | 0.97 (0.79-1.20) |                   |
| Black                                       |                                           |                  |                   |
| Caffeinated coffee, cups/day <sup>†</sup>   |                                           |                  |                   |
| None                                        | 451/973 (46.4)                            | 1.00             |                   |
| 1                                           | 165/338 (48.8)                            | 1.09 (0.77-1.55) |                   |
| 2-3                                         | 137/246 (55.7)                            | 1.61 (1.06-2.43) | 0.11              |
| ≥4                                          | 15/30 (50.0)                              | 1.39 (0.56-3.46) |                   |
| Decaffeinated coffee, cups/day <sup>†</sup> |                                           |                  |                   |
| None                                        | 579/1171 (49.4)                           | 1.00             |                   |
| 1                                           | 112/240 (46.7)                            | 1.11 (0.74-1.65) |                   |
| 2-3                                         | 55/136 (40.4)                             | 0.83 (0.50-1.41) | 0.69              |
| ≥4                                          | 4/10 (40.0)                               | 0.52 (0.09-2.98) |                   |
| Caffeinated tea, cups/day <sup>‡</sup>      |                                           |                  |                   |
| None                                        | 638/1323 (48.2)                           | 1.00             |                   |
| 1                                           | 83/161 (51.6)                             | 1.20 (0.74-1.94) |                   |



|                                                | No./total survived to<br>age 90 <sup>s</sup> | OR (95% CI)      | P-value for trend |
|------------------------------------------------|----------------------------------------------|------------------|-------------------|
| 2-3                                            | 55/106 (51.9)                                | 1.36 (0.78-2.37) | 0.26              |
| ≥4                                             | 5/13 (38.5)                                  | 1.03 (0.23-4.49) |                   |
| Hispanic                                       |                                              |                  |                   |
| Caffeinated coffee,<br>cups/day <sup>†</sup>   |                                              |                  |                   |
| None                                           | 100/189 (52.9)                               | 1.00             | 0.47              |
| 1                                              | 77/141 (54.6)                                | 1.63 (0.86-3.07) |                   |
| 2-3                                            | 79/153 (51.6)                                | 1.52 (0.83-2.76) |                   |
| ≥4                                             | 12/25 (48.0)                                 | 2.43 (0.73-8.10) |                   |
| Decaffeinated coffee,<br>cups/day <sup>†</sup> |                                              |                  |                   |
| None                                           | 183/346 (52.9)                               | 1.00             | 0.32              |
| 1                                              | 45/87 (51.7)                                 | 1.26 (0.66-2.40) |                   |
| 2-3                                            | 28/54 (51.9)                                 | 0.98 (0.41-2.32) |                   |
| ≥4                                             | 4/9 (44.4)                                   | 0.22 (0.02-2.28) |                   |
| Caffeinated tea,<br>cups/day <sup>‡</sup>      |                                              |                  |                   |
| None                                           | 214/392 (54.6)                               | 1.00             | 0.32              |
| 1                                              | 35/68 (51.5)                                 | 0.91 (0.42-1.99) |                   |
| 2-3                                            | 20/42 (47.6)                                 | 0.64 (0.26-1.61) |                   |
| ≥4                                             | 4/8 (50.0)                                   | 0.72 (0.15-3.37) |                   |
| Asian/Pacific Islander                         |                                              |                  |                   |
| Caffeinated coffee,<br>cups/day <sup>†</sup>   |                                              |                  |                   |
| None                                           | 253/379 (66.8)                               | 1.00             | 0.73              |
| 1                                              | 138/219 (63.0)                               | 0.90 (0.58-1.40) |                   |
| 2-3                                            | 101/153 (66.0)                               | 1.07 (0.65-1.76) |                   |
| ≥4                                             | 8/16 (50.0)                                  | 0.38 (0.10-1.48) |                   |
| Decaffeinated coffee,<br>cups/day <sup>†</sup> |                                              |                  |                   |
| None                                           | 390/600 (65.0)                               | 1.00             | 0.49              |
| 1                                              | 69/108 (63.9)                                | 1.24 (0.71-2.18) |                   |
| 2-3                                            | 28/40 (70.0)                                 | 2.53 (0.98-6.51) |                   |
| ≥4                                             | 5/9 (55.6)                                   | 0.25 (0.02-3.06) |                   |
| Caffeinated tea,<br>cups/day <sup>‡</sup>      |                                              |                  |                   |
| None                                           | 293/445 (65.8)                               | 1.00             |                   |
| 1                                              | 81/133 (60.9)                                | 0.81 (0.49-1.34) |                   |

|                                                | No./total survived to<br>age 90 <sup>§</sup> | OR (95% CI)      | P-value for trend |
|------------------------------------------------|----------------------------------------------|------------------|-------------------|
| 2-3                                            | 109/162 (67.3)                               | 0.96 (0.59-1.58) | 0.57              |
| ≥4                                             | 16/26 (61.5)                                 | 0.77 (0.30-1.98) |                   |
| Other                                          |                                              |                  |                   |
| Caffeinated coffee,<br>cups/day <sup>†</sup>   |                                              |                  |                   |
| None                                           | 96/172 (55.8)                                | 1.00             | 0.98              |
| 1                                              | 44/82 (53.7)                                 | 0.93 (0.47-1.86) |                   |
| 2-3                                            | 66/121 (54.6)                                | 0.93 (0.51-1.72) |                   |
| ≥4                                             | 13/26 (50.0)                                 | 1.93 (0.65-5.74) |                   |
| Decaffeinated coffee,<br>cups/day <sup>†</sup> |                                              |                  |                   |
| None                                           | 149/263 (56.7)                               | 1.00             | 0.53              |
| 1                                              | 33/66 (50.0)                                 | 1.04 (0.51-2.12) |                   |
| 2-3                                            | 24/46 (52.2)                                 | 1.05 (0.48-2.32) |                   |
| ≥4                                             | 6/17 (35.3)                                  | 0.40 (0.12-1.33) |                   |
| Caffeinated tea,<br>cups/day <sup>‡</sup>      |                                              |                  |                   |
| None                                           | 155/291 (53.3)                               | 1.00             | 0.87              |
| 1                                              | 29/45 (64.4)                                 | 1.64 (0.69-3.90) |                   |
| 2-3                                            | 31/57 (54.4)                                 | 1.18 (0.54-2.58) |                   |
| ≥4                                             | 5/12 (41.7)                                  | 0.72 (0.17-3.08) |                   |

CI, confidence interval; OR, odds ratio.

\*P-values for interaction between caffeinated coffee and race/ethnicity, decaffeinated coffee and race/ethnicity, and caffeinated tea and race/ethnicity were 0.39, 0.68, and 0.97, respectively.

<sup>†</sup>Multivariable model includes caffeinated coffee intake, decaffeinated coffee intake, age, race/ethnicity, marital status, education, employment status, income, smoking history, pack-years of smoking, alcohol consumption, body mass index, total physical activity, oral contraceptive use, hormone therapy use, Healthy Eating Index-2015 score, self-rated health, physical function, depressive symptoms, coronary heart disease, stroke, diabetes, and cancer.

<sup>‡</sup>Multivariable model includes caffeinated coffee intake, decaffeinated coffee intake, age, race/ethnicity, marital status, education, employment status, income, smoking history, pack-years of smoking, alcohol consumption, body mass index, total physical activity, oral contraceptive use, hormone therapy use, Healthy Eating Index-2015 score, self-rated health, physical function, depressive symptoms, coronary heart disease, stroke, diabetes, and cancer.

<sup>§</sup>Represents the no./total survived to age 90 among each individual category of beverage intake.

Supplementary Table S7. Multivariable associations of coffee and tea consumption with survival to age 90 among older women stratified by body mass index, Women's Health Initiative, 1993-2018\*

|                                             | No./total survived to age 90 <sup>§</sup> | OR (95% CI)      | P-value for trend |
|---------------------------------------------|-------------------------------------------|------------------|-------------------|
| Normal weight                               |                                           |                  |                   |
| Caffeinated coffee, cups/day <sup>†</sup>   |                                           |                  |                   |
| None                                        | 2701/4804 (56.2)                          | 1.00             |                   |
| 1                                           | 1194/2107 (56.7)                          | 0.91 (0.80-1.04) |                   |
| 2-3                                         | 1678/3057 (54.9)                          | 1.02 (0.91-1.14) | 0.60              |
| ≥4                                          | 426/861 (49.5)                            | 0.92 (0.77-1.11) |                   |
| Decaffeinated coffee, cups/day <sup>†</sup> |                                           |                  |                   |
| None                                        | 3981/7176 (55.5)                          | 1.00             |                   |
| 1                                           | 1011/1784 (56.7)                          | 1.02 (0.90-1.16) |                   |
| 2-3                                         | 820/1463 (56.1)                           | 1.09 (0.95-1.26) | 0.62              |
| ≥4                                          | 151/324 (46.6)                            | 0.72 (0.54-0.95) |                   |
| Caffeinated tea, cups/day <sup>‡</sup>      |                                           |                  |                   |
| None                                        | 4345/7906 (55.0)                          | 1.00             |                   |
| 1                                           | 880/1549 (56.8)                           | 1.09 (0.95-1.25) |                   |
| 2-3                                         | 691/1219 (56.7)                           | 1.05 (0.90-1.22) | 0.66              |
| ≥4                                          | 150/266 (56.4)                            | 0.98 (0.72-1.32) |                   |
| Overweight                                  |                                           |                  |                   |
| Caffeinated coffee, cups/day <sup>†</sup>   |                                           |                  |                   |
| None                                        | 2211/4063 (54.4)                          | 1.00             |                   |
| 1                                           | 1026/1851 (55.4)                          | 1.04 (0.91-1.19) |                   |
| 2-3                                         | 1626/2862 (56.8)                          | 1.07 (0.95-1.21) | 0.005             |
| ≥4                                          | 457/798 (57.3)                            | 1.41 (1.16-1.71) |                   |
| Decaffeinated coffee, cups/day <sup>†</sup> |                                           |                  |                   |
| None                                        | 3425/6180 (55.4)                          | 1.00             |                   |
| 1                                           | 878/1558 (56.4)                           | 1.09 (0.95-1.26) |                   |
| 2-3                                         | 785/1441 (54.5)                           | 0.99 (0.86-1.15) | 0.72              |
| ≥4                                          | 173/327 (52.9)                            | 0.93 (0.71-1.22) |                   |
| Caffeinated tea, cups/day <sup>‡</sup>      |                                           |                  |                   |
| None                                        | 3832/6979 (54.9)                          | 1.00             |                   |
| 1                                           | 748/1291 (57.9)                           | 1.05 (0.90-1.21) |                   |

|                                                | No./total survived to<br>age 90 <sup>§</sup> | OR (95% CI)      | P-value for trend |
|------------------------------------------------|----------------------------------------------|------------------|-------------------|
| 2-3                                            | 643/1139 (56.5)                              | 1.05 (0.89-1.22) | 0.66              |
| ≥4                                             | 131/252 (52.0)                               | 0.89 (0.65-1.22) |                   |
| Obese                                          |                                              |                  |                   |
| Caffeinated coffee,<br>cups/day <sup>†</sup>   |                                              |                  |                   |
| None                                           | 1226/2604 (47.1)                             | 1.00             | 0.96              |
| 1                                              | 489/1046 (46.8)                              | 0.91 (0.76-1.09) |                   |
| 2-3                                            | 784/1675 (46.8)                              | 0.98 (0.84-1.15) |                   |
| ≥4                                             | 221/505 (43.8)                               | 0.96 (0.76-1.22) |                   |
| Decaffeinated coffee,<br>cups/day <sup>†</sup> |                                              |                  |                   |
| None                                           | 1807/3919 (46.1)                             | 1.00             | 0.27              |
| 1                                              | 419/891 (47.0)                               | 1.06 (0.88-1.27) |                   |
| 2-3                                            | 383/779 (49.2)                               | 1.12 (0.92-1.36) |                   |
| ≥4                                             | 79/174 (45.4)                                | 1.05 (0.71-1.55) |                   |
| Caffeinated tea,<br>cups/day <sup>‡</sup>      |                                              |                  |                   |
| None                                           | 2087/4474 (46.7)                             | 1.00             | 0.27              |
| 1                                              | 324/680 (47.7)                               | 1.06 (0.86-1.30) |                   |
| 2-3                                            | 284/607 (46.8)                               | 1.14 (0.92-1.42) |                   |
| ≥4                                             | 56/123 (45.5)                                | 1.04 (0.66-1.64) |                   |

CI, confidence interval; OR, odds ratio.

\*P-values for interaction between caffeinated coffee and body mass index, decaffeinated coffee and body mass index, and tea and body mass index were 0.05, 0.55, and 0.99, respectively.

<sup>†</sup>Multivariable model includes caffeinated coffee intake, decaffeinated coffee intake, age, race/ethnicity, marital status, education, employment status, income, smoking history, pack-years of smoking, alcohol consumption, body mass index, total physical activity, oral contraceptive use, hormone therapy use, Healthy Eating Index-2015 score, self-rated health, physical function, depressive symptoms, coronary heart disease, stroke, diabetes, and cancer.

<sup>‡</sup>Multivariable model includes caffeinated coffee intake, decaffeinated coffee intake, age, race/ethnicity, marital status, education, employment status, income, smoking history, pack-years of smoking, alcohol consumption, body mass index, total physical activity, history of oral contraceptive use, hormone therapy use, Healthy Eating Index-2015 score, self-rated health, physical function, depressive symptoms, coronary heart disease, stroke, diabetes, and cancer.

<sup>§</sup>Represents the no./total survived to age 90 among each individual category of beverage intake.

Supplementary Table S8. Multivariable associations of coffee and tea consumption with survival to age 90 among older women stratified by smoking status, Women's Health Initiative, 1993-2018\*

|                                             | No./total survived to age 90 <sup>§</sup> | OR (95% CI)      | P-value for trend |
|---------------------------------------------|-------------------------------------------|------------------|-------------------|
| Never smoked                                |                                           |                  |                   |
| Caffeinated coffee, cups/day <sup>†</sup>   |                                           |                  |                   |
| None                                        | 3933/6790 (57.9)                          | 1.00             |                   |
| 1                                           | 1645/2837 (58.0)                          | 0.92 (0.83-1.03) |                   |
| 2-3                                         | 2237/3761 (59.5)                          | 1.03 (0.93-1.14) | 0.30              |
| ≥4                                          | 551/923 (59.7)                            | 1.09 (0.91-1.29) |                   |
| Decaffeinated coffee, cups/day <sup>†</sup> |                                           |                  |                   |
| None                                        | 5628/9693 (58.1)                          | 1.00             |                   |
| 1                                           | 1388/2363 (58.7)                          | 1.06 (0.95-1.18) |                   |
| 2-3                                         | 1065/1784 (59.7)                          | 1.15 (1.01-1.30) | 0.18              |
| ≥4                                          | 200/354 (56.5)                            | 0.87 (0.66-1.13) |                   |
| Caffeinated tea, cups/day <sup>‡</sup>      |                                           |                  |                   |
| None                                        | 6058/10370 (58.4)                         | 1.00             |                   |
| 1                                           | 1224/2060 (59.4)                          | 1.02 (0.91-1.15) |                   |
| 2-3                                         | 960/1682 (57.1)                           | 0.98 (0.86-1.11) | 0.52              |
| ≥4                                          | 199/346 (57.5)                            | 0.89 (0.68-1.16) |                   |
| Past smoker                                 |                                           |                  |                   |
| Caffeinated coffee, cups/day <sup>†</sup>   |                                           |                  |                   |
| None                                        | 2176/4473 (48.7)                          | 1.00             |                   |
| 1                                           | 1048/2056 (51.0)                          | 1.02 (0.89-1.16) |                   |
| 2-3                                         | 1745/3442 (50.7)                          | 1.05 (0.94-1.17) | 0.38              |
| ≥4                                          | 488/986 (49.5)                            | 1.11 (0.93-1.32) |                   |
| Decaffeinated coffee, cups/day <sup>†</sup> |                                           |                  |                   |
| None                                        | 3447/6895 (50.0)                          | 1.00             |                   |
| 1                                           | 898/1787 (50.3)                           | 1.06 (0.93-1.21) |                   |
| 2-3                                         | 886/1777 (49.9)                           | 0.96 (0.84-1.09) | 0.36              |
| ≥4                                          | 197/431 (45.7)                            | 0.87 (0.68-1.11) |                   |
| Caffeinated tea, cups/day <sup>‡</sup>      |                                           |                  |                   |
| None                                        | 4034/8240 (49.0)                          | 1.00             |                   |
| 1                                           | 709/1365 (51.9)                           | 1.12 (0.97-1.29) |                   |

|                                                | No./total survived to<br>age 90 <sup>§</sup> | OR (95% CI)      | P-value for trend |
|------------------------------------------------|----------------------------------------------|------------------|-------------------|
| 2-3                                            | 641/1195 (53.6)                              | 1.21 (1.04-1.41) | 0.02              |
| ≥4                                             | 127/255 (49.8)                               | 1.00 (0.74-1.36) |                   |
| Current smoker                                 |                                              |                  |                   |
| Caffeinated coffee,<br>cups/day <sup>†</sup>   |                                              |                  |                   |
| None                                           | 93/320 (29.1)                                | 1.00             | 0.68              |
| 1                                              | 43/152 (28.3)                                | 0.76 (0.44-1.31) |                   |
| 2-3                                            | 122/428 (28.5)                               | 0.75 (0.50-1.12) |                   |
| ≥4                                             | 77/288 (26.7)                                | 0.91 (0.58-1.41) |                   |
| Decaffeinated coffee,<br>cups/day <sup>†</sup> |                                              |                  |                   |
| None                                           | 230/856 (26.9)                               | 1.00             | 0.72              |
| 1                                              | 36/117 (30.8)                                | 0.96 (0.56-1.66) |                   |
| 2-3                                            | 43/138 (31.2)                                | 1.32 (0.81-2.16) |                   |
| ≥4                                             | 11/46 (23.9)                                 | 0.68 (0.27-1.74) |                   |
| Caffeinated tea,<br>cups/day <sup>‡</sup>      |                                              |                  |                   |
| None                                           | 256/925 (27.7)                               | 1.00             | 0.60              |
| 1                                              | 35/116 (30.2)                                | 1.39 (0.80-2.41) |                   |
| 2-3                                            | 32/106 (30.2)                                | 0.94 (0.54-1.64) |                   |
| ≥4                                             | 12/44 (27.3)                                 | 1.37 (0.58-3.28) |                   |

CI, confidence interval; OR, odds ratio.

\*P-values for interaction between caffeinated coffee and smoking, decaffeinated coffee and smoking, and tea and smoking were 0.72, 0.51, and 0.34, respectively.

<sup>b</sup>Multivariable model includes caffeinated coffee intake, decaffeinated coffee intake, age, race/ethnicity, marital status, education, employment status, income, smoking history, pack-years of smoking, alcohol consumption, body mass index, total physical activity, oral contraceptive use, hormone therapy use, Healthy Eating Index-2015 score, self-rated health, physical function, depressive symptoms, coronary heart disease, stroke, diabetes, and cancer.

<sup>c</sup>Multivariable model includes caffeinated coffee intake, decaffeinated coffee intake, age, race/ethnicity, marital status, education, employment status, income, smoking history, pack-years of smoking, alcohol consumption, body mass index, total physical activity, oral contraceptive use, hormone therapy use, Healthy Eating Index-2015 score, self-rated health, physical function, depressive symptoms, coronary heart disease, stroke, diabetes, and cancer.

<sup>§</sup>Represents the no./total survived to age 90 among each individual category of beverage intake.
